# Supplementary material
Source: PubMed Central journal article supplement (PMC5419071)
Supplement: NIHMS835641-supplement.pdf [file NIHMS835641-supplement.pdf]

| Patient ID | Fish signal number (reported as 2 if no abnormal population over cutoff) |        |      |        |        |     |     |     |     |          |        | Percentage of total cells with FISH signal number |        |        |        |        |        |        |        |        |           |        |
|------------|--------------------------------------------------------------------------|--------|------|--------|--------|-----|-----|-----|-----|----------|--------|---------------------------------------------------|--------|--------|--------|--------|--------|--------|--------|--------|-----------|--------|
|            | TP53                                                                     | ARID1A | ZEB1 | CDKN2A | DNMT3A | ATM | RB1 | FAS | MYC | STAT3/SB | CARD11 | TP53                                              | ARID1A | ZEB1   | CDKN2A | DNMT3A | ATM    | RB1    | FAS    | MYC    | STAT3/B   | CARD11 |
| 1          | 1                                                                        | 2      | 2    | 2      | 2      | 2   | 2   | 2   | 2   | 2        | 2      | 85.0%                                             | 100.0% | 100.0% | 99.0%  | 100.0% | 100.0% | 100.0% | 100.0% | 86.0%  | 100.0%    | 100.0% |
| 2          | 1                                                                        | 1      | 2    | 2      | 2      | 2   | 2   | 2   | 2   | 2        | 2      | 88.0%                                             | 42.5%  | 42.5%  | 98.0%  | 100.0% | 88.0%  | 99.0%  | 88.0%  | 98.0%  | 42.5%     | 100.0% |
| 3          | 1                                                                        | 2      | 2    | 1      | 2      | 1   | 2   | 2   | 2   | 3        | 2      | 100.0%                                            | 100.0% | 100.0% | 98.0%  | 100.0% | 100.0% | 100.0% | 100.0% | 97.0%  | 88.5%     | 100.0% |
| 4          | 1                                                                        | 1      | 1    | 2      | 2      | 2   | 2   | 2   | 2   | 3        | 2      | 76.0%                                             | 58.5%  | 58.5%  | 95.5%  | 98.0%  | 100.0% | 100.0% | 98.0%  | 80.0%  | 58.5%     | 98.0%  |
| 5          | 1                                                                        | 2      | 1    | 1      | 1      | 2   | 2   | 2   | 1   | 2        | 2      | 34.5%                                             | 100.0% | 11.0%  | 28.5%  | 36.0%  | 100.0% | 99.0%  | 36.0%  | 94.0%  | 100.0%    | 100.0% |
| 6          | 1                                                                        | 1      | 1    | 2      | 1      | 2   | 2   | 2   | 2   | 3        | 1      | 94.0%                                             | 84.0%  | 61.0%  | 99.0%  | 92.0%  | 94.0%  | 100.0% | 92.0%  | 100.0% | 23.0%     | 92.0%  |
| 7          | 1                                                                        | 2      | 0    | 2      | 1      | 2   | 1   | 2   | 2   | 3        | 3      | 73.5%                                             | 100.0% | 64.0%  | 99.0%  | 94.0%  | 100.0% | 71.0%  | 100.0% | 50.6%  | 64.0%     | 94.0%  |
| 8          | 1                                                                        | 1      | 1    | 1      | 1      | 2   | 1   | 1   | 1   | 4        | 2      | 82.0%                                             | 54.0%  | 54.0%  | 36.0%  | 36.0%  | 100.0% | 87.0%  | 36.0%  | 13.5%  | 100.0%    | 100.0% |
| 9          | 1                                                                        | 2      | 1    | 2      | 1      | 2   | 2   | 2   | 1   | 3        | 3      | 59.9%                                             | 100.0% | 64.0%  | 100.0% | 47.0%  | 100.0% | 100.0% | 59.0%  | 59.0%  | 46.0%     | 59.0%  |
| 10         | 1                                                                        | 4      | 2    | 1      | 4      | 2   | 4   | 4   | 4   | 3,6      | 5      | 53.0%                                             | 39.5%  | 100.0% | 87.0%  | 40.5%  | 100.0% | 36.0%  | 40.5%  | 15.0%  | 52%,39.5% | 40.5%  |
| 11         | 1                                                                        | 2      | 2    | 1      | 2      | 1   | 1   | 2   | 2   | 2        | 2      | 40.0%                                             | 90.0%  | 90.0%  | 56.0%  | 100.0% | 70.0%  | 64.0%  | 100.0% | 100.0% | 90.0%     | 100.0% |
| 12         | 1                                                                        | 1      | 2    | 2      | 2      | 1   | 2   | 2   | 2   | 3        | 3      | 99.5%                                             | 94.0%  | 96.0%  | 100.0% | 99.5%  | 99.5%  | 100.0% | 92.0%  | 52.0%  | 80.0%     | 99.5%  |
| 13         | 1                                                                        | 1      | 2    | 2      | 1      | 2   | 2   | 2   | 2   | 3        | 2      | 95.0%                                             | 80.5%  | 100.0% | 100.0% | 91.0%  | 95.0%  | 99.5%  | 100.0% | 80.5%  | 80.5%     | 100.0% |
| 14         | 2                                                                        | 2      | 2    | 2      | 2      | 2   | 2   | 2   | 2   | 3        | 2      | 100.0%                                            | 100.0% | 100.0% | 99.5%  | 100.0% | 100.0% | 100.0% | 100.0% | 62.0%  | 9.0%      | 100.0% |
| 15         | 2                                                                        | 2      | 2    | 2      | 2      | 2   | 2   | 2   | 2   | 2        | 2      | 100.0%                                            | 100.0% | 100.0% | 98.5%  | 100.0% | 100.0% | 100.0% | 100.0% | 93.0%  | 100.0%    | 94.5%  |
| 16         | 2                                                                        | 2      | 2    | 2      | 2      | 2   | 2   | 2   | 2   | 2        | 2      | 100.0%                                            | 99.0%  | 99.0%  | 100.0% | 100.0% | 100.0% | 99.0%  | 100.0% | 99.0%  | 99.0%     | 100.0% |
| 17         | 2                                                                        | 2      | 2    | 2      | 2      | 2   | 2   | 2   | 2   | 2        | 2      | 100.0%                                            | 100.0% | 100.0% | 100.0% | 100.0% | 100.0% | 100.0% | 100.0% | 100.0% | 100.0%    | 100.0% |
| 18         | 2                                                                        | 2      | 2    | 2      | 2      | 2   | 2   | 2   | 2   | 2        | 2      | 100.0%                                            | 99.5%  | 99.5%  | 99.5%  | 99.5%  | 100.0% | 99.5%  | 100.0% | 99.5%  | 99.5%     | 99.5%  |
| 19         | 2                                                                        | 2      | 2    | 2      | 2      | 2   | 2   | 2   | 2   | 2        | 2      | 99.0%                                             | 100.0% | 100.0% | 100.0% | 100.0% | 99.0%  | 100.0% | 100.0% | 100.0% | 100.0%    | 100.0% |
| 20         | 2                                                                        | 2      | 2    | 2      | 2      | 2   | 2   | 2   | 2   | 2        | 2      | 99.0%                                             | 100.0% | 100.0% | 100.0% | 100.0% | 99.0%  | 100.0% | 100.0% | 100.0% | 100.0%    | 100.0% |
| 21         | 2                                                                        | 2      | 2    | 2      | 2      | 2   | 2   | 2   | 2   | 2        | 2      | 99.0%                                             | 100.0% | 100.0% | 98.5%  | 98.5%  | 99.0%  | 99.5%  | 98.5%  | 99.5%  | 100.0%    | 98.5%  |
| 22         | 2                                                                        | 2      | 2    | 2      | 2      | 2   | 2   | 2   | 2   | 2        | 2      | 100.0%                                            | 100.0% | 100.0% | 100.0% | 99.5%  | 100.0% | 100.0% | 99.5%  | 100.0% | 100.0%    | 99.5%  |
| 23         | 2                                                                        | 2      | 2    | 2      | 2      | 2   | 2   | 2   | 2   | 2        | 2      | 100.0%                                            | 100.0% | 100.0% | 99.0%  | 100.0% | 100.0% | 99.0%  | 100.0% | 100.0% | 100.0%    | 100.0% |
| 24         | 2                                                                        | 2      | 2    | 2      | 2      | 2   | 2   | 2   | 2   | 2        | 2      | 100.0%                                            | 100.0% | 100.0% | 99.0%  | 99.0%  | 100.0% | 100.0% | 99.0%  | 99.5%  | 100.0%    | 99.0%  |

| Patient Characteristics |             |     |     |                  |           |         |                |                       |                      |                        |
|-------------------------|-------------|-----|-----|------------------|-----------|---------|----------------|-----------------------|----------------------|------------------------|
| Patient ID              | Diagnosis   | Age | Sex | J7 ISCL blood le | PCR       | CD4/CD8 | CD3+ T Cell/μl | Percent CD26- of CD4+ | Percent CD7- of CD4+ | Sorted population      |
| 1                       | Sezary      | 69  | M   | B2               | +         | 5.8     | 534            | 31.0%                 | 33.8%                | CD3+CD4+CD7-CD26-      |
| 2                       | Sezary      | 69  | F   | B2               | +         | 13.5    | 2937           | 67.8%                 | 98.0%                | CD3+CD4+CD7+CD26-      |
| 3                       | Sezary      | 63  | F   | B2               | -(Vbeta+) | 8.6     | 533            | 19.1%                 | 42.2%                | CD3+CD4+CD26-VB7.2+    |
| 4                       | Sezary      | 79  | F   | B2               | +         | 25.9    | 757            | 46.5%                 | 3.8%                 | CD3+CD4+CD7-CD26-VB3+  |
| 5                       | Sezary      | 91  | M   | B2               | +         | 6.1     | 1362           | 44.9%                 | 50.7%                | CD3+CD4+CD7-CD26-      |
| 6                       | Sezary      | 87  | M   | B2               | +         | 3.6     | 454            | 40.4%                 | 16.5%                | CD3+CD4+CD26-          |
| 7                       | Sezary      | 73  | F   | B2               | +         | 25.6    | 20235          | 90.3%                 | 88.4%                | non-sorted PBMC        |
| 8                       | Sezary      | 63  | F   | B2               | +         | 6.6     | 838            | 63.8%                 | 9.4%                 | CD3+CD4+CD7+CD26-      |
| 9                       | Sezary      | 76  | M   | B2               | +         | 58.5    | 9764           | 90.7%                 | 86.7%                | non-sorted PBMC        |
| 10                      | Sezary      | 82  | M   | B2               | +         | 10.4    | 3083           | 52.7%                 | 62.7%                | CD3+CD4+CD26-VB2+      |
| 11                      | pllicular M | 72  | M   | B0               | +         | 8.4     | 1437           | 14.1%                 | 19.7%                | CD3+CD4+CD7-CD26-VB20+ |
| 12                      | F with tum  | 61  | M   | B2               | +         | 16.7    | 2967           | 29.8%                 | 14.8%                | CD3+CD4+CD26-          |
| 13                      | ch/plaque   | 60  | M   | B2               | +         | 4.1     | 484            | 14.9%                 | 53.0%                | CD3dimCD4+CD7+CD26-    |
| 14                      | ch/plaque   | 51  | M   | B0               | +         | 2.7     | 1141           | 29.8%                 | 14.6%                | CD3+CD4+CD26-          |
| 15                      | pllicular M | 47  | M   | B0               | +         | 1.1     | 553            | 5.0%                  | 5.8%                 | VB2+                   |
| 16                      | ch/plaque   | 61  | F   | B0               | +         | 2.7     | 1415           | 10.4%                 | 27.3%                | CD3+CD4+CD7-CD26-      |
| 17                      | ch/plaque   | 82  | F   | B2               | +         | 2.9     | 1071           | 21.8%                 | 41.5%                | CD3+CD4+CD7-CD26-      |
| 18                      | ch/plaque   | 86  | M   | B0               | +         | 1.5     | 1110           | 20.8%                 | 18.8%                | CD3+CD4+CD26-          |
| 19                      | ch/plaque   | 76  | M   | B0               | +         | 2.6     | 820            | 11.2%                 | 14.6%                | CD3+CD4+CD7-CD26-      |
| 20                      | ch/plaque   | 66  | F   | B0               | NA        | 4.0     | 713            | 9.4%                  | 6.1%                 | CD3+CD4+CD7-CD26-      |
| 21                      | ch/plaque   | 84  | M   | B0               | +         | 1.5     | 1478           | 22.5%                 | 18.0%                | CD3+CD4+CD7-CD26-      |
| 22                      | ular mucii  | 37  | M   | B0               | -         | 5.7     | 1493           | 23.4%                 | 15.6%                | CD3+CD4+CD26-          |
| 23                      | ch/plaque   | 74  | F   | B0               | NA        | 1.9     | 505            | 17.0%                 | 15.2%                | CD3+CD4+CD26-          |
| 24                      | ematous     | 73  | F   | B0               | +         | 1.3     | 367            | 23.6%                 | 15.9%                | CD3+CD4+CD26-          |

| CD8+ Sorted Cells: Percentage of cells with normal (2x) signal of total counted (100 or 200) cells |        |        |        |        |        |        |        |          |        |        |        |  |
|----------------------------------------------------------------------------------------------------|--------|--------|--------|--------|--------|--------|--------|----------|--------|--------|--------|--|
| Patient ID                                                                                         | TP53   | ATM    | MYC    | RB1    | CDKN2A | ARID1A | ZEB1   | STAT3/5B | FAS    | DMNT3A | CARD11 |  |
| 1                                                                                                  | 97     | 98     | 93     | 92     | 84     | 97     | 97     | 94       | 95     | 98     | 98     |  |
| 2                                                                                                  | 94     | 99     | 94     | 95     | 94     | 94     | 97     | 97       | 98     | 97     | 95     |  |
| 3                                                                                                  | 99     | 98     | 96     | 100    | 97     | 98     | 94     | 96       | 97     | 97     | 98     |  |
| 4                                                                                                  | 97     | 96     | 97     | 97     | 99     | 94     | 98     | 99       | 97     | 97     | 99     |  |
| 8                                                                                                  | 97     | 96     | 95     | 99     | 95     | 97     | 97     | 96       | 94     | 98     | 98     |  |
| 11                                                                                                 | 96     | 95     | 99     | 94     | 97     | 97     | 100    | 93       | 99     | 99     | 98     |  |
| 15                                                                                                 | 96     | 95     | 94     | 91     | 94     | 96     | 95     | 99       | 98     | 99     | 100    |  |
| 18                                                                                                 | 98     | 96     | 93     | 96     | 96.5   | 94     | 96     | 97       | 97     | 97     | 99     |  |
| Mean                                                                                               | 96.750 | 96.625 | 95.125 | 95.500 | 94.563 | 95.875 | 96.750 | 96.375   | 96.875 | 97.750 | 98.125 |  |
| STDV                                                                                               | 1.488  | 1.506  | 2.100  | 3.162  | 4.594  | 1.642  | 1.832  | 2.134    | 1.642  | 0.886  | 1.458  |  |
| 99.00%                                                                                             | 92.286 | 92.107 | 88.824 | 86.013 | 80.781 | 90.949 | 91.253 | 89.973   | 91.949 | 95.091 | 93.752 |  |
| (M+/-3STDV)%                                                                                       | 46.143 | 46.054 | 44.412 | 43.007 | 40.391 | 45.474 | 45.627 | 44.987   | 45.974 | 47.545 | 46.876 |  |
| False Pos #                                                                                        | 3.250  | 3.375  | 4.875  | 4.500  | 5.438  | 4.125  | 3.250  | 3.625    | 3.125  | 2.250  | 1.875  |  |
| Normal 95% Cutoff                                                                                  | 0.077  | 0.078  | 0.096  | 0.092  | 0.102  | 0.087  | 0.077  | 0.081    | 0.075  | 0.064  | 0.059  |  |
| Normal 99% Cutoff                                                                                  | 0.098  | 0.099  | 0.119  | 0.114  | 0.125  | 0.109  | 0.098  | 0.103    | 0.096  | 0.084  | 0.078  |  |

| CTCL Exome Versus SS FISH Detected Gene Copy Number Alterations (GCNAs) |       |        |       |        |        |       |       |       |       |            |        |                       |
|-------------------------------------------------------------------------|-------|--------|-------|--------|--------|-------|-------|-------|-------|------------|--------|-----------------------|
| Genes                                                                   | TP53  | ARID1A | ZEB1  | CDK2NA | DNMT3A | ATM   | RB1   | FAS   | MYC   | STAT3(/5B) | CARD11 | Total Sezary patients |
| Patients with GCNAs, exome study                                        | 35    | 23     | 24    | 16     | 14     | 11    | 10    | 16    | 17    | 25         | 9      | 40                    |
| Proportion Abnormal                                                     | 0.875 | 0.575  | 0.600 | 0.400  | 0.350  | 0.275 | 0.250 | 0.400 | 0.425 | 0.625      | 0.225  |                       |
| Standard Error                                                          | 0.052 | 0.078  | 0.077 | 0.077  | 0.075  | 0.071 | 0.068 | 0.077 | 0.078 | 0.077      | 0.066  |                       |
| Patients with GCNAs, FISH (separate cohort)                             | 9     | 5      | 5     | 3      | 4      | 2     | 2     | 5     | 8     | 7          | 3      | 10                    |
| Proportion Abnormal                                                     | 0.900 | 0.500  | 0.500 | 0.300  | 0.400  | 0.200 | 0.200 | 0.500 | 0.800 | 0.700      | 0.300  |                       |
| Standard Error                                                          | 0.095 | 0.158  | 0.158 | 0.145  | 0.155  | 0.126 | 0.126 | 0.158 | 0.126 | 0.145      | 0.145  |                       |

\*Choi J, Goh G, Walradt T, et al. (2015) Genomic landscape of cutaneous T cell lymphoma. *Nat Genet* 47:1011-9.

## Isolation of malignant T cells in leukemic CTCL

Approximately 45 mL of peripheral blood was obtained from each patient in Sodium Heparin Blood Collection Tubes (BD Vacutainer) and diluted with 90 mL PBS. Diluted blood was layered over 15 mL of ficoll (GE Healthcare Ficoll-Paque Premium or Isolymp from CTL Scientific Supply Corp.) in 50 mL conical tubes prior to centrifugation for 35 minutes at 1500 rpm. Buffy coats were isolated and washed with RPMI in 15 mL conical tubes, centrifuged for 10 minutes at 1400 rpm, resuspended in RPMI, rewashed in RPMI and centrifuged again for 8 minutes at 1100 rpm to minimize residual Ficoll. After RPMI resuspension, cells were counted (and if not immediately processed further were frozen in 90% RPMI 10% DMSO in liquid nitrogen). Malignant T cells were isolated from total mononuclear cells by either fluorescence-activated cell sorting (FACS) or magnetic bead sorting.

For samples sorted by FACS, mononuclear cells were first stained with: anti-CD3-BV-421 (clone OKT3, Biolegend, San Diego, CA), anti-CD4-PerCP (clone RPA-T4, Biolegend), anti-CD7-APC (clone CD7-6B7, Biolegend), anti-CD8-PE-Cy7 (clone SK1, Biolegend), anti-CD26-PE (clone BA5b, Biolegend). For patients with a known V-beta clone, cells were also stained with corresponding anti-V-beta-PE (Beckman Coulter, Inc.). After washing twice with stain buffer, cells were sorted (BD FACSAria) with gates to identify population previously defined as abnormal by clinical flow cytometry. In most cases, lymphocytes were gated from forward- and side-scatter followed by subsequent gating on CD3+CD4+CD8- cells to allow visualization of CD4+ T cells. (If V-beta antibody was present, V-beta positive CD4+ T cells were further gated thereafter.) A scatter plot of CD4+ (and V-beta+ if present) T cells along CD26 and CD7 axes allowed for sorting of the previously defined abnormal populations, whether CD26-CD7-, CD26-CD7+/-, or CD26+/-CD7-. In cases where previous studies demonstrated an abnormal population with atypical markers, such as CD3 dim or CD4 dim, corresponding adjustments in gating were made. For controls, CD3+CD8+ lymphocytes were sorted simultaneously.

For samples sorted by magnetic beads, mononuclear cells were stained with T Cell Biotin-Antibody Cocktail as well as anti-CD26-biotin (eBioscience) and/or anti-CD7-biotin (eBioscience) and incubated with anti-biotin microbeads according to the manufacturer's instructions to isolate populations previously identified as abnormal by flow cytometry; in most cases this population was CD4+CD26-CD7- or CD4+CD26-CD7+/-.

### Fixation

Sorted cells were pelleted in a 5 ml centrifuge tube and gently resuspended in 4.5 ml hypotonic solution (0.075M KCl). After 16 minutes incubation at room temperature, 300 ul fresh fixative (3 parts methanol to 1 part acetic acid) was added to each sample, followed by gentle inversion and 10 minutes incubation at room temperature. Next cells were centrifuged at 1100 rpm for 10 minutes, resuspended in 4 ml fixative, incubated at room temperature for 10 minutes, and centrifuged again at 1100 rpm for 10 minutes. After resuspension in 1 ml fixative, samples were stored at 34 for up to 1 month before performing FISH.

### Hybridization

For both commercially available and custom probes, fixed samples underwent overnight FISH hybridization using probes for TP53, ATM, MYC, RB, and CDKN2A (P53/ATM Probe Combination LPH 052, cMYC Breakapart LPH 010, RB1 Deletion LPS 011, P16 Deletion LPH 009-A; CytoCell Aquarius) and newly developed probes for ARID1A, ZEB1, STAT3/5B, DNMT3A, CARD11, and FAS (CytoCell myProbes Custom Probes). Hybridization for all probes was performed according to standard manufacturer instructions for CytoCell Aquarius probes.

#### Probe visualization and quantification

Probes were quantified using a fluorescent light microscope (BX-60 or BX-43, Olympus; or Axio Observer Z1, Zeiss) running CytoVision (Version 7.4, Leica Biosystems) or TissueFAXs (Version 4.2, TissueGnostics) software. For each probe, signals in 100 or 200 nuclei were examined.
